# Supplementary material
Source: Springer Nature journal article supplement (https://www.springermedizin.de/resource/supplementary/13256_2010_1541_MOESM2_ESM.pdf/9647866)

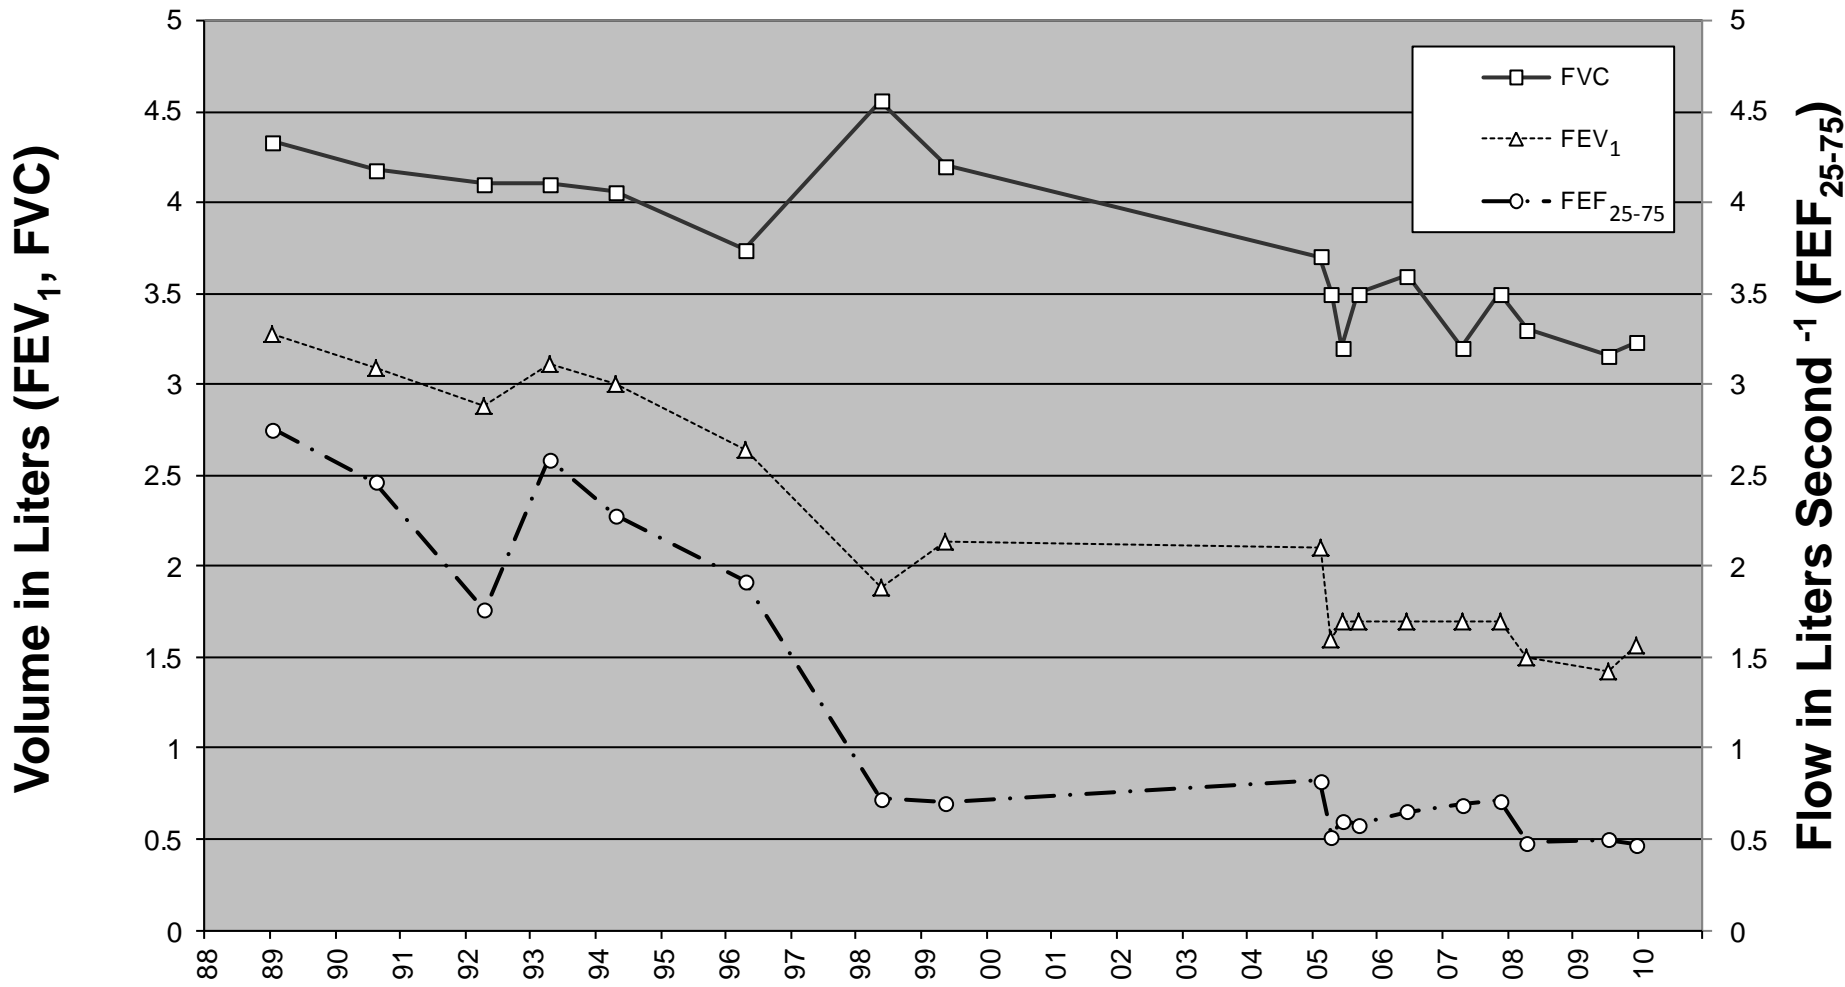

**Heavy to Intermediate Dust Exposure**

**Light Dust**

**Off Work**

Calendar Year of Spirometry

Supplement: MOESM2 [file 9647866]
